# Supplementary material for: Oxidation of p-[125I]Iodobenzoic Acid and p-[211At]Astatobenzoic Acid Derivatives and Evaluation In Vivo
Source: MDPI journal article supplement (doi:10.3390/ijms231810655), 2022-09-13
Supplement: s1 [file s1]

# Supplementary Materials

for

Oxidation of *p*-[<sup>125</sup>I]iodobenzoic acid and *p*-[<sup>211</sup>At]astatobenzoic acid derivatives and  
evaluation in vivo

**Table S1: Concentration (%ID/g) of Radioactivity for Co-injected O<sub>2</sub>X-Ph-dPEG<sub>4</sub>-CO<sub>2</sub>Me derivatives [<sup>125</sup>I]**11** and [<sup>211</sup>At]**13** in selected tissues of athymic mice.<sup>a</sup>**

| Tissues   | <u>1 h<sup>b,c</sup></u> |               | <u>4 h</u>   |               | <u>24h</u>   |               |
|-----------|--------------------------|---------------|--------------|---------------|--------------|---------------|
|           | <u>I-125</u>             | <u>At-211</u> | <u>I-125</u> | <u>At-211</u> | <u>I-125</u> | <u>At-211</u> |
| blood     | 0.22 ± 0.14              | 1.19 ± 0.20   | 0.23 ± 0.18  | 1.05 ± 0.11   | 0.01 ± 0.00  | 0.05 ± 0.03   |
| muscle    | 0.12 ± 0.05              | 0.65 ± 0.15   | 0.03 ± 0.01  | 0.54 ± 0.04   | 0.00 ± 0.00  | 0.01 ± 0.01   |
| lung      | 0.32 ± 0.10              | 7.73 ± 1.52   | 0.14 ± 0.07  | 6.60 ± 0.55   | 0.54 ± 0.85  | 1.65 ± 1.41   |
| kidney    | 0.84 ± 0.23              | 3.10 ± 0.61   | 0.40 ± 0.15  | 2.65 ± 0.18   | 0.03 ± 0.01  | 0.24 ± 0.08   |
| spleen    | 0.35 ± 0.28              | 8.81 ± 6.44   | 0.08 ± 0.04  | 8.09 ± 0.62   | 0.01 ± 0.00  | 0.38 ± 0.31   |
| liver     | 1.73 ± 0.96              | 1.19 ± 0.23   | 0.64 ± 0.47  | 1.05 ± 0.12   | 0.01 ± 0.00  | 0.11 ± 0.03   |
| intestine | 9.59 ± 8.73              | 2.29 ± 0.77   | 3.39 ± 1.15  | 1.70 ± 0.29   | 0.02 ± 0.01  | 0.19 ± 0.06   |
| neck      | 0.49 ± 0.09              | 10.43 ± 2.77  | 0.35 ± 0.14  | 11.78 ± 4.88  | 0.02 ± 0.01  | 2.52 ± 1.57   |
| stomach   | 3.53 ± 1.09              | 19.24 ± 6.82  | 0.65 ± 0.16  | 20.75 ± 5.99  | 0.02 ± 0.01  | 1.69 ± 0.49   |

<sup>a</sup>Values shown are % injected dose / gram ± standard deviation. <sup>b</sup>Time of sacrifice from coinjection of [<sup>125</sup>I]**11** and [<sup>211</sup>At]**13**. <sup>c</sup>Data were obtained for *n* = 5 mice at each time point; average animal weight for the 3 time-groups, 26.43 ± 1.83 g; Injectate for each animal had 3 µCi of [<sup>125</sup>I]**11** and 3 µCi of [<sup>211</sup>At]**13** in approximately 100 µL of 0.9% sterile saline.

**Table S2: Concentration (% ID/g) of Radioactivity for Co-injected [<sup>125</sup>I]NaIO<sub>3</sub> and [<sup>211</sup>At]NaAtO<sub>3</sub> in selected tissues of athymic mice.<sup>a</sup>**

| Tissues   | <u>1 h</u> <sup>b,c</sup> |               | <u>4 h</u>   |               | <u>24h</u>   |               |
|-----------|---------------------------|---------------|--------------|---------------|--------------|---------------|
|           | <u>I-125</u>              | <u>At-211</u> | <u>I-125</u> | <u>At-211</u> | <u>I-125</u> | <u>At-211</u> |
| blood     | 2.15 ± 0.36               | 1.23 ± 0.10   | 1.55 ± 0.37  | 1.12 ± 0.09   | 0.02 ± 0.00  | 0.03 ± 0.06   |
| muscle    | 0.57 ± 0.05               | 0.60 ± 0.09   | 0.36 ± 0.09  | 0.45 ± 0.06   | 0.01 ± 0.00  | 0.00 ± 0.06   |
| lung      | 1.82 ± 0.40               | 7.05 ± 1.26   | 1.23 ± 0.28  | 5.78 ± 0.78   | 0.05 ± 0.02  | 1.03 ± 0.53   |
| kidney    | 1.48 ± 0.36               | 3.02 ± 0.46   | 1.17 ± 0.37  | 2.74 ± 0.24   | 0.04 ± 0.01  | 0.33 ± 0.22   |
| spleen    | 1.14 ± 0.22               | 6.79 ± 1.46   | 0.98 ± 0.54  | 6.37 ± 1.05   | 0.02 ± 0.00  | 0.49 ± 0.25   |
| liver     | 0.84 ± 0.15               | 1.06 ± 0.11   | 0.73 ± 0.18  | 1.08 ± 0.16   | 0.03 ± 0.01  | 0.16 ± 0.07   |
| intestine | 1.08 ± 0.30               | 1.49 ± 0.09   | 0.78 ± 0.27  | 1.56 ± 0.22   | 0.02 ± 0.01  | 0.23 ± 0.12   |
| neck      | 10.71 ± 2.39              | 9.74 ± 2.42   | 11.78 ± 3.26 | 13.56 ± 4.81  | 0.39 ± 0.33  | 4.30 ± 3.18   |
| stomach   | 13.52 ± 3.27              | 17.35 ± 4.81  | 8.61 ± 2.69  | 17.50 ± 5.33  | 0.13 ± 0.05  | 2.04 ± 0.92   |

<sup>a</sup>Values shown are % injected dose / gram ± standard deviation. <sup>b</sup>Time of sacrifice from coinjection of [<sup>125</sup>I]NaIO<sub>3</sub> and [<sup>211</sup>At]NaAtO<sub>3</sub>. <sup>c</sup>Data were obtained for *n* = 5 mice at each time point; average animal weight: 1 h group; 31.30 ± 1.71 g; 4 h group; 32.42 ± 1.42 g; 24 h group; 22.92 ± 1.93 g. Injectate for each animal had ~5 µCi of [<sup>125</sup>I]NaIO<sub>3</sub> and ~5 µCi of [<sup>211</sup>At]NaAtO<sub>3</sub> in approximately 100 µL of 0.9% sterile saline.
